# Supplementary material
Source: publisher figshare collection journal article supplement (https://acs.figshare.com/ndownloader/files/4094071)

## Supporting information – Foster, et al.

**Supplementary Table 1: Rimonabant EC<sub>50</sub> values in the THLE cell lines**

| THLE cell line    | Mean (μM) | SD  | n |
|-------------------|-----------|-----|---|
| 1A2               | 8.5       | 2.8 | 4 |
| 2C9               | 4.5**     | 0.6 | 6 |
| 2C19              | 6.0       | 1.6 | 3 |
| 2D6               | 9.0       | 1.7 | 3 |
| 3A4               | 1.3***    | 0.2 | 7 |
| Null <sup>1</sup> | 8.4       | 2.0 | 8 |

<sup>1</sup> where the EC<sub>50</sub> value exceeded the top concentration tested the EC<sub>50</sub> value was set to the top concentration (10 μM). \*\* P<0.01; \*\*\* p<0.001 statistically significant difference from the THLE-Null EC<sub>50</sub>; paired t-test

**Supplementary Table 2: The effect of Ritonavir on the Rimonabant EC<sub>50</sub> values in the THLE-3A4 and Null cell lines**

| THLE cell line    | Ritonavir (0.3 μM) | Mean (μM) | SD  | n |
|-------------------|--------------------|-----------|-----|---|
| 3A4               | -                  | 1.3       | 0.2 | 4 |
| Null1             | -                  | 8.4       | 2.0 | 4 |
|                   |                    |           |     |   |
| 3A4               | +                  | 4.3*      | 1.1 | 4 |
| Null <sup>1</sup> | +                  | 8.4       | 1.5 | 4 |

<sup>1</sup> where the EC<sub>50</sub> value exceeded the top concentration tested the EC<sub>50</sub> value was set to the top concentration (10 μM). \* p<0.05 statistically significant difference from EC<sub>50</sub> in THLE-3A4 cells in absence of inhibitor; paired t-test

**Supplementary Figure 1 LC-MS analysis of supernatants from THLE-3A4 cells incubated with [ $^{14}\text{C}$ ]-rimonabant**

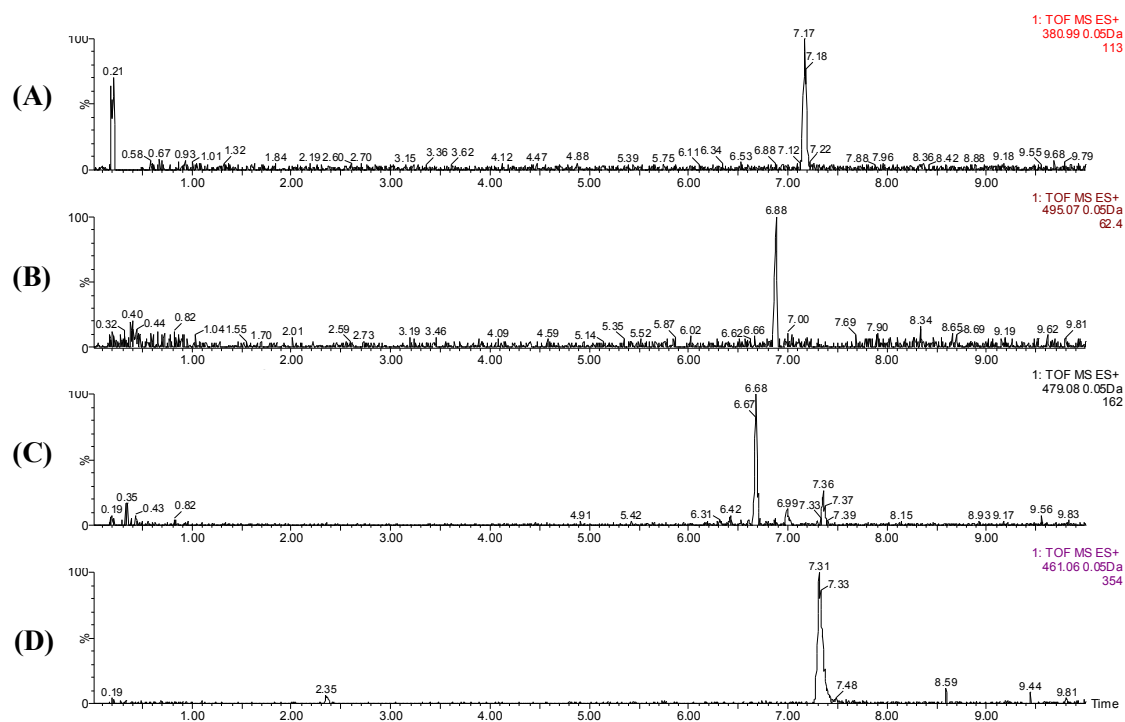

Extracted ion chromatograms for (A) amide cleavage product 6 ( $\text{MH}^+$  380.9959), (B) +32 ( $\text{MH}^+$  495.0752), (C) +16 ( $\text{MH}^+$  479.0802) and (D) -2 Da ( $\text{M}^+$  461.0697) metabolites.

## Supplementary Figure 2 Toxicity of NAP in the THLE cells

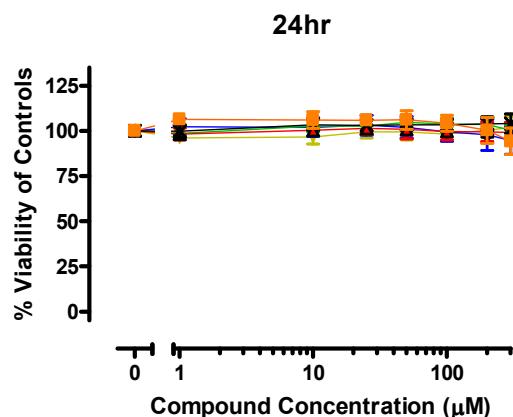

Evaluation of the toxicity of NAP in the THLE-1A2, 2C9, 2C19, 2D6, 3A4 and Null cells.

The cells were exposed to 0 – 300 µM NAP for 24 hours; ▼ 1A2, ◇ 2C9, ■ 2C19, ● 2D6, △

3A4, x Null. Data are mean ± S.D. from 3 experiments each performed in triplicate.

## Supplementary Figure 3 Intracellular NAP determination

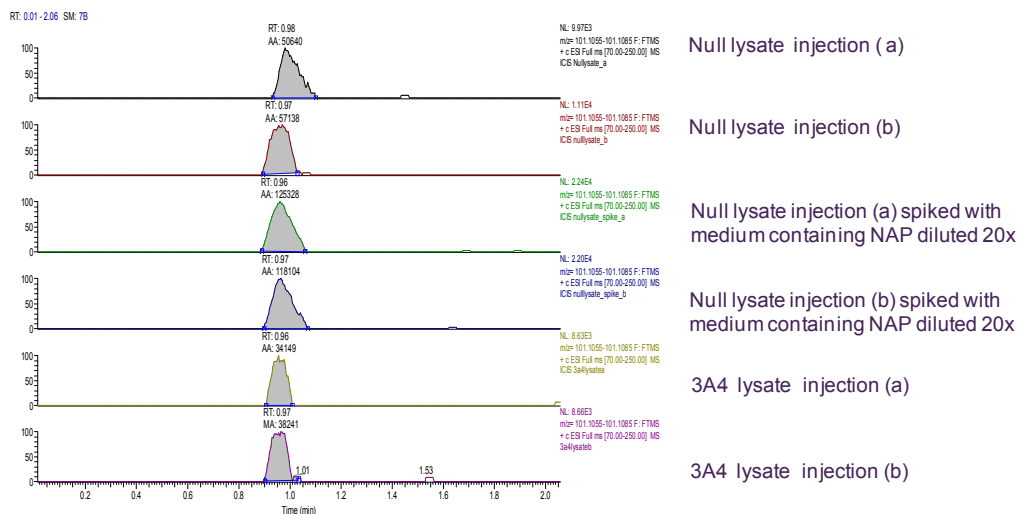

Evaluation of the intracellular penetration of NAP. Twenty four hours post-dosing with 300 µM NAP the medium was removed, the cells washed with 40 mL HBSS-/-, scraped into 1 mL de-ionised water and then lysed by sonication prior to analysis by LCMS. Data are from

duplicate injections ((a) and (b)). THLE-Null lysate samples were spiked with 5  $\mu$ L 300  $\mu$ M NAP diluted 20 fold (0.75  $\mu$ M final concentration) to confirm the identification of the peak and to give an approximate concentration in the initial samples in the absence of a standard curve (area increased by  $\sim 2$  fold).

**Supplementary Figure 4 Structure of Ritonavir**

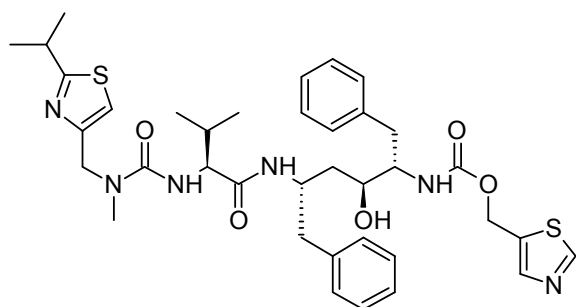

Supplement: Supplementary file 1 [file 4094071]
